1 **GREB1 regulates proliferation of estrogen receptor positive breast cancer**  
2 **through modulation of PI3K/Akt/mTOR signaling**

3

4 Running Title: GREB1 regulates PI3K/Akt/mTOR signaling

5

6 Corinne N. Haines<sup>1, 2</sup>, Klingensmith, H.D<sup>1</sup>, and Craig J. Burd<sup>1, 2</sup>

7

8 <sup>1</sup>Department of Molecular Genetics, The Ohio State University, Columbus, Ohio, USA

9 <sup>2</sup>The Ohio State University Comprehensive Cancer Center, Columbus, Ohio, USA

10

11 *Corresponding author and person to whom reprint requests should be addressed:*

12 Craig J. Burd, PhD

13 Department of Molecular Genetics

14 The Ohio State University

15 920 Biomedical Research Tower, 460 W. 12<sup>th</sup> Ave., Columbus, OH, 43210

16 Phone: 614- 688-7458

17 Fax: 614- 292-6356

18 E-mail: [Craig.Burd@osumc.edu](mailto:Craig.Burd@osumc.edu)

19 **Abstract**

20 Over 70% of breast cancers express the estrogen receptor (ER) and depend on ER  
21 activity for survival and proliferation. While hormone therapies that target receptor activity are  
22 initially effective, patients invariably develop resistance which is often associated with activation  
23 of the PI3K/Akt/mTOR pathway. While the mechanism by which estrogen regulates proliferation  
24 is not fully understood, one gene target of ER, growth regulation by estrogen in breast cancer 1  
25 (GREB1), is required for hormone-dependent proliferation. However, the molecular function by  
26 which GREB1 regulates proliferation is unknown. Herein, we validate that knockdown of GREB1  
27 results in growth arrest and that exogenous GREB1 expression initiates oncogene-induced  
28 senescence, suggesting that an optimal level of GREB1 expression is necessary for  
29 proliferation of breast cancer cells. Under both of these conditions, GREB1 is able to regulate  
30 signaling through the PI3K/Akt/mTOR pathway. GREB1 acts intrinsically through PI3K to  
31 regulate PIP<sub>3</sub> levels and Akt activity. Critically, growth suppression of estrogen-dependent  
32 breast cancer cells by GREB1 knockdown is rescued by expression of constitutively activated  
33 Akt. Together, these data identify a novel molecular function by which GREB1 regulates breast  
34 cancer proliferation through Akt activation and provides a mechanistic link between estrogen  
35 signaling and the PI3K pathway.

36

## 37 **Introduction**

38 Breast cancer is the most frequently diagnosed malignancy in women (1). Over 70% of  
39 breast cancer patients are diagnosed with the estrogen receptor-positive (ER+) subtype, which  
40 is characterized by the expression of the transcription factor ER and dependence on ER activity  
41 for tumor cell growth and survival (2-6). Patients diagnosed with the ER+ subtype of breast  
42 cancer are typically prescribed endocrine therapies that target ER activity (2, 3, 6). However,  
43 resistance to endocrine therapies invariably occurs, leading to re-activation of the ER,  
44 expression of ER-target genes, and ultimately, patient relapse (2, 3, 6). Treatment options for  
45 patients that are resistant to endocrine therapies are limited, highlighting the need for innovative  
46 therapies that target downstream of the ER (2, 3, 6).

47 Crosstalk between the ER and the PI3K/Akt/mTOR pathway has been implicated in ER+  
48 breast cancer progression and resistance to endocrine therapies (7-10). The *PIK3CA* gene,  
49 which encodes the catalytic subunit of the PI3K enzyme, is the most commonly mutated gene in  
50 ER+ breast cancer patients with over 40% incidence (11). This mutation is speculated to be a  
51 causal event in breast cancer progression, suggesting there is some need to upregulate this  
52 pathway in the development of ER+ breast cancer (11). Studies have indicated the ER can  
53 interact with PI3K to regulate its kinase activity in an estrogen-dependent manner (12). Further,  
54 inhibition of the PI3K/Akt/mTOR pathway increases ER expression and sensitivity of breast  
55 cancer cells to tamoxifen treatment, suggesting that activation of this pathway is associated with  
56 resistance to endocrine therapies through downregulation of ER (13). Together, these data  
57 indicate interdependence between ER and PI3K/Akt/mTOR signaling, however, the molecular  
58 basis and clinical relevance for this cooperation remains unclear.

59 Herein, we show that the ER gene target, growth regulation by estrogen in breast cancer 1  
60 (GREB1), is a regulator of the PI3K/Akt/mTOR pathway, linking ER activation to this critical

61 signaling pathway. Expression of GREB1 has been highly correlated to ER-positivity in breast  
62 cancer cell lines and patient samples (14-17). Previous studies have shown that knockdown of  
63 GREB1 results in significantly reduced proliferation and colony formation of ER+ breast cancer  
64 cell lines indicating, a required role for GREB1 in regulation of estrogen-dependent proliferation  
65 (16-18). However, it appears that an optimal level of GREB1 expression is necessary for  
66 proliferation of breast cancer cell lines as exogenous expression of GREB1 inhibits growth (18).  
67 Interestingly, growth repression by exogenous expression of GREB1 was also observed in ER-  
68 negative cell lines, indicating the ability of GREB1 to regulate proliferation of breast cancer cells  
69 is independent of ER activity (18). Despite the clear association of GREB1 and proliferation of  
70 ER+ breast cancer, the molecular function of the protein and the mechanism by which it  
71 regulates proliferation remain largely unknown. In this study, we characterize a novel  
72 mechanism by which GREB1 regulates proliferation of ER+ breast cancer cell lines through  
73 activation of Akt.

## 74 **Materials and methods**

### 75 **Cell lines and reagents**

76 MCF7, T47D, ZR-75-1, and HEK-293T cells were validated using Short Tandem Repeat  
77 analysis by the Genomics Core in the Research Technology Support Facility (Michigan State  
78 University, East Lansing, MI 48824). HCC1500 cells were purchased from the American Type  
79 Culture Collection. Cells were maintained as previously described (18). For experiments with  
80 EGF stimulation, cells were cultured in serum-free media for 16 hours before being stimulated  
81 with 1 ng/mL recombinant human EGF (Thermo) for the indicated time. The inhibitors GDC-  
82 0941 was obtained from Cayman Chemicals and were used at the indicated concentration for  
83 24 hours prior to harvest of the cells.

### 84 **Plasmids**

85 3XFLAG PCDNA and H2BGFP have been described previously (18-20). GIPZ lentiviral  
86 non-specific shRNA (# RHS4346) and lentiviral GREB1-targeted shRNA plasmids  
87 (V2LHS\_139192 and V3LHS\_372339) were obtained from Open Biosystems. MISSION shRNA  
88 constructs targeted to PIK3CA (TRCN0000196 582, TRCN0000195 203, TRCN0000010 406),  
89 PTEN (TRCN0000002 745, TRCN0000002 747, TRCN0000002 749), and PDK1  
90 (TRCN0000001 476, TRCN0000039 778, TRCN0000039 782, TRCN0000010 413) were  
91 purchased from Sigma Aldrich. Myristoylated (Myr) AKT1 from pBabe-Puro-Myr-Flag-AKT1 (21)  
92 was cloned into a pLenti-hygro backbone to create pLenti hygro Myr FLAG AKT1 (CA AKT)  
93 using standard Gibson cloning (NEB).

#### 94 **Immunoblot analysis and antibodies**

95 Cell lysates were prepared, subjected to immunoblot analysis, and visualized on a LI-  
96 COR Odyssey system as previously described (18, 22). Immunoblots were probed with the  
97 following antibodies: GREB1 (abcam; ab72999 or CST; P76195 Clone 9C1),  $\beta$ -actin (Cell  
98 Signaling Technologies (CST); 3700), phosphor-p38 (CST; 9211S), p38 (CST; 9212), phosphor-  
99 MEK1/2 (CST; 9121), MEK1/2 (CST; 9122), phosphor-ERK1/2 (CST; 4370); ERK1/2 (CST;  
100 4695), phospho-MKK3/6 (CST; 12280), phospho-MSK1 (CST; 9595), phospho-ATF2 (CST;  
101 5112), phospho-HSP27 (CST; 9709), phospho-MAPKAPK2 (CST; 3007), phospho-PTEN (CST;  
102 9551), PTEN (CST; 9556), phospho-PDK1 (CST; 3438), PDK1 (CST; 5662), phospho-Akt  
103 Thr308 (CST; 13038), phospho-Akt Ser473 (CST; 9271S), Akt (CST; 2920S), PP2A (CST;  
104 2041T), phospho-GSK3 $\beta$  (CST; 5558), mTOR (CST; 2983), Rictor (CST; 2114), Raptor (CST;  
105 2280), and p110 $\alpha$  (CST; 4249T).

#### 106 **Adenovirus**

107 GREB1 adenovirus was purified as previously described (18). Ad5-CMV-eGFP  
108 adenovirus (Baylor College of Medicine Vector Development Labs, Houston, TX 77030) was  
109 used as a control.

#### 110 **Alamar blue assay**

111 Cells were treated with 0.04 g/L resazurin sodium salt in phosphate buffered saline  
112 (PBS) at 37°C for 1 hour. Fluorescence was measured on a BioTek Synergy microplate reader  
113 using a 540/35 excitation filter and a 590/20 emission filter. Data are depicted as mean  
114 fluorescence normalized to day 0  $\pm$  SD for each condition from 3 biological replicates. Statistical  
115 significance for alamar blue assays was determined using either a two-tailed Student's t-test  
116 (exogenous GREB1 expression) or a one-way ANOVA with post-hoc Tukey's HSD test (shRNA  
117 experiments).

#### 118 **SA- $\beta$ -gal staining**

119 Cells transduced with GFP or GREB1 adenovirus were plated on poly-L-lysine coated  
120 coverslips. Cells were fixed and stained for SA- $\beta$ -gal activity using the Senescence  $\beta$ -  
121 Galactosidase Staining Kit (CST #9860) as previously described (23).

#### 122 **Conditioned media assay**

123 MCF7 cells were transduced with either GFP or GREB1 adenovirus. After 24 hours,  
124 transduced cells were washed in PBS and fresh media added. The following day, media was  
125 collected from the transduced cells and centrifuged at 500 x g for 5 minutes to pellet any cellular  
126 debris. Target cells were washed twice with PBS prior to the addition of conditioned media. After  
127 24 hours, all cells were harvested by scraping in cold PBS containing 10 nM calyculin A (Cell  
128 Signaling).

#### 129 **Co-culture assay**

130 MCF7 cells were transduced with adenovirus expressing either GFP or GREB1 (both  
131 adenovirus vectors express GFP). The following day, transduced cells were trypsinized and  
132 replated at a 1:1 ratio with un-transduced MCF7 cells. Cells were harvested after 24 hours by  
133 trypsinization and washed twice with cold PBS containing 10 nM calyculin A (Cell Signaling).  
134 Cells were sorted from both the adGFP and adGREB1 co-cultures using a Becton Dickinson  
135 FACS Aria II cell sorter into GFP-positive (transduced) and GFP-negative (un-transduced)  
136 populations. Cell lysates were prepared from the sorted populations and immunoblot analysis  
137 was performed as described above.

### 138 **Immunofluorescence microscopy**

139 Cells were plated on poly-L-lysine-coated coverslips. Following treatment, cells were  
140 fixed in 4% methanol-free formaldehyde (Thermo) diluted in PBS for 15 minutes at room  
141 temperature. Cells were then washed three times in PBS before permeabilization with 0.5%  
142 saponin, 1% BSA PBS solution at room temperature for 15 minutes. The cells were labeled with  
143 the indicated primary antibodies for 2 hours at room temperature in a humidified chamber.  
144 Coverslips were then washed three times in PBS before incubation with secondary antibodies  
145 (Alexa Fluor 555 goat anti-mouse and Alexa Fluor 555 goat anti-rabbit; Invitrogen) at room  
146 temperature for 1 hour in a humidified chamber, protected from light. Coverslips were mounted  
147 on microscope slides with VECTASHIELD Hard Set Mounting Medium with DAPI (Vector  
148 Laboratories). Images were obtained using a spinning disk confocal microscope (Ultra-VIEW  
149 VoX CSU-X1 system; Perkin Elmer) and analyzed using Velocity (Perkin Elmer).

### 150 **PIP<sub>3</sub> quantification**

151 MCF7 cells were transduced with either GFP or GREB1 adenovirus. 24 hours after  
152 transduction, cells were placed in serum-free, phenol-red-free DMEM for 16 hours. Lipids were

153 extracted and PIP<sub>3</sub> levels measured using the PIP<sub>3</sub> Mass ELISA kit (Echelon K-2500s)  
154 according to the manufacturer's instructions.

## 155 **Results**

### 156 **GREB1 initiates cellular senescence**

157 Our previous work has suggested that an optimal level of GREB1 expression is  
158 necessary for proliferation of breast cancer cell lines. This work showed that both GREB1  
159 knockdown (18) and exogenous expression of GREB1 results in growth arrest (Fig. 1A-B)(18).  
160 We previously reported that exogenous expression of GREB1 did not induce apoptosis (18),  
161 thus we investigated the ability of GREB1 overexpression to initiate oncogene-induced cellular  
162 senescence. Two ER+ breast cancer cell lines, MCF7 and ZR-75-1 cells, were transduced with  
163 adenovirus expressing either GFP or GREB1. Following 7 days of exogenous GREB1  
164 expression, the cells were fixed and stained for SA- $\beta$ -galactosidase activity, a marker of cellular  
165 senescence (23, 24). Compared to GFP control cells, cells overexpressing GREB1 had a large,  
166 flattened morphology and characteristic blue staining associated with SA- $\beta$ -galactosidase  
167 activity (Fig. 1C). These data suggest that exogenous GREB1 expression is able to induce  
168 cellular senescence to inhibit proliferation of breast cancer cell lines.

### 169 **Exogenous GREB1 expression induces hyperactivation of the PI3K/Akt/mTOR pathway**

170 In order to delineate the mechanism by which GREB1 regulates proliferation, we chose  
171 to focus our attention on two signaling pathways thought to play a critical role in regulating both  
172 senescence and proliferation phenotypes: the p38 MAPK pathway and the PI3K/Akt/mTOR  
173 pathway (25-27). MCF7 cells were transduced with adenovirus expressing GFP or GREB1 and  
174 after 48 hours, cell lysates were analyzed by immunoblot for activation of various nodes in the  
175 p38 MAPK pathway (Fig. 2A) and the PI3K/Akt/mTOR pathway (Fig. 2B). Our data indicate that  
176 exogenous GREB1 expression induces an increase in the activation and phosphorylation of p38



177 and its downstream effector, MAPKAPK2, however, the activation and/or expression of  
178 upstream regulators of p38 (MEK1/2, ERK1/2, MKK3/6) and other downstream effectors (MSK1,  
179 ATF2, and HSP27) were largely unaffected (Fig. 2A). Analysis of the PI3K/Akt/mTOR pathway  
180 revealed hyperactivation of Akt, as well as increased phosphorylation of GSK3 $\beta$ , a downstream  
181 effector of Akt, when GREB1 was exogenously expressed in MCF7 cells (Fig. 2B). As the  
182 PI3K/Akt/mTOR pathway is frequently altered in breast cancer, we analyzed the effect of  
183 GREB1 overexpression on Akt activation in a panel of ER+ breast cancer cell lines with wildtype  
184 or differing alterations to the PI3K/Akt/mTOR pathway (28). While MCF7, ZR-75-1, and T47D  
185 cells harbor mutations in this pathway, each cell line has varying levels of Akt activation with  
186 MCF7 cells demonstrating the least constitutive activity (Supplemental Fig. 1). In cells lines  
187 without constitutive maximal activity of this pathway, GREB1 induces a strong activation of Akt  
188 (Fig. 2C). In contrast, T47D cells, which have a PIK3CA mutation resulting in constitutively  
189 active Akt that does not respond to serum deprivation (Supplemental Fig. 1), are unaffected by  
190 GREB1 expression (Fig. 2C).

### 191 **GREB1-induced hyperactivation of Akt is PI3K-dependent**

192 Akt requires phosphorylation at two sites, Thr308 and Ser473, by PDK1 and mTORC2  
193 respectively, for maximal activation (29-31). Both phosphorylation events are dependent on  
194 PI3K and occur downstream of PI3K conversion of PIP<sub>2</sub> to PIP<sub>3</sub> (29, 31). Thus, we sought to  
195 determine if GREB1 was acting to regulate Akt activation upstream or downstream of PI3K. To  
196 this end, we targeted PI3K activity with the pharmaceutical inhibitor GDC0941. MCF7 cells were  
197 simultaneously treated with DMSO or GDC0941 and transduced with adenovirus expressing  
198 GFP or GREB1. After 24 hours, cell lysates were harvested and activation of Akt at Thr308 and  
199 Ser473 were evaluated by immunoblot analysis. The expected hyperactivation of Akt was  
200 observed in DMSO-treated cells that were transduced with GREB1 adenovirus (Fig. 3A). PI3K  
201 inhibition by GDC0941 demonstrated a marked decrease in basal Akt activation in the control

202 GFP-transduced cells (Fig. 3A). A decrease in GREB1-mediated activation was also observed,  
203 particularly at Ser473 (Fig. 3A), suggesting that GREB1 is activating the canonical PI3K/Akt  
204 axis.

205 To confirm this result and further probe other nodes in the pathway, MCF7 cells were  
206 transduced with lentivirus expressing shRNA targeted to a non-specific control (shNS), PIK3CA,  
207 PTEN, or PDK1. Following selection, cells were transduced with adenovirus expressing GFP or  
208 GREB1. After 24 hours, cell lysates were harvested and analyzed via immunoblot. Control cells  
209 transduced with non-specific shRNA demonstrated the expected increase in phosphorylation of  
210 Akt (Thr308 and Ser473) and GSK3 $\beta$  when GREB1 was exogenously expressed (Fig. 3B).  
211 Knockdown of PIK3CA expression reduced Akt activation in both control and GREB1-  
212 expressing cells (Fig. 3B). GREB1-induced hyper-phosphorylation of GSK3 $\beta$  was also reduced  
213 when PIK3CA was knocked-down (Fig. 3B). Knockdown of PTEN enhanced GREB1-induced  
214 hyperactivation of Akt at Thr308, suggesting the mechanism of GREB1 action is not through  
215 phosphatase inhibition (Fig. 3B). In contrast to our pharmacological approach (Fig. 2B), GREB1-  
216 induced hyperactivation of Akt at Thr308 was completely blocked by knockdown of PDK1, the  
217 primary kinase for this site (29-32)(Fig. 3B). As expected, PDK1 knockdown had no effect on  
218 GREB1-induced hyperactivation of Akt at Ser473, as this is not the primary kinase for this site  
219 (29-31) (Fig. 3B). Knockdown of PDK1 diminished GREB1-induced phosphorylation of GSK3 $\beta$   
220 (Fig. 3B). These data further demonstrate that GREB1-induced hyperactivation of Akt is  
221 dependent on signaling through the canonical PI3K pathway.

## 222 **GREB1 activates Akt through intracellular mechanisms**

223 Canonical activation of PI3K and Akt occurs through activation of receptor tyrosine  
224 kinases (RTK) or G-protein-coupled receptors (GPCR) by external stimuli (29, 33). We first  
225 sought to determine if GREB1-mediated Akt regulation is dependent upon induction and

226 secretion of a signaling molecule that activates the PI3K/Akt/mTOR pathway. To this end, MCF7  
227 cells were transduced with adenovirus expressing GFP or GREB1. Media from transduced cells  
228 was transferred to un-transduced MCF7 cells. After 24 hours, cell lysates were harvested and  
229 activation of Akt was analyzed by immunoblot. As expected, exogenous expression of GREB1  
230 induced hyperactivation of Akt at Ser473 when compared to GFP-transduced cells (Fig, 4A).  
231 However, conditioned media was unable to induce hyperactivation of Akt in un-transduced cells  
232 (Fig. 4A).

233         Alternatively, exogenous GREB1 may induce the expression of a membrane-bound  
234 signaling molecule that could activate the PI3K/Akt/mTOR pathway. To investigate this  
235 possibility, MCF7 cells were transduced with adenovirus expressing GFP or GREB1 and then  
236 co-cultured at a 1:1 ratio with un-transduced MCF7 cells. After 24 hours, the cells were  
237 harvested and GFP-positive, adenovirus-transduced cells (GFP or GREB1), were sorted from  
238 GFP-negative, un-transduced cells. All populations were then analyzed for activation of Akt by  
239 immunoblot. Both GFP-transduced cells and cells co-cultured with the GFP-transduced cells  
240 had similar levels of Akt activation (Fig. 4B). Exogenous expression of GREB1 induced the  
241 expected hyperactivation of Akt at Ser473 within the transduced cells; however, the un-  
242 transduced co-culture cells did not demonstrate Akt hyperactivation (Fig. 4B). While these data  
243 are negative, they clearly demonstrate that GREB1 regulates Akt activation through in an  
244 intracellular mechanism that does not require extracellular activation of RTKs.

#### 245 **Exogenous GREB1 promotes recruitment of Akt to the plasma membrane**

246         Akt is typically activated via recruitment to the plasma membrane by interaction with  
247 PIP<sub>3</sub>, however, it is believed that there are other pools of activated Akt on endomembrane  
248 surfaces and within the nucleus (29). To determine the localization of activated Akt induced by  
249 exogenous GREB1 expression, MCF7 cells were transduced with either GFP or GREB1

250 adenovirus. Following transduction, the cells were serum-starved for 16 hours to reduce basal  
251 Akt activation before stimulation of the pathway with EGF. Cells were then fixed and stained  
252 with DAPI and the indicated Akt antibodies. As both adenoviral vectors expressed GFP, we  
253 focused our imaging on transduced cell populations. In serum-starved, GFP-transduced cells,  
254 staining for activated Akt was minimal and staining for total Akt resulted in diffuse staining  
255 throughout the cytoplasm (Fig. 5A, Supplemental Fig. 2A-B). In contrast, cells transduced with  
256 GREB1 adenovirus under serum-starved conditions had distinct staining for activated and total  
257 Akt, primarily localized to the plasma membrane (Fig. 5A, Supplemental Fig. 2A-B). When  
258 stimulated with EGF for 5 minutes, both GFP- and GREB1-transduced cells demonstrated  
259 activated Akt and total Akt at the plasma membrane (Fig. 5A, Supplemental Fig. 2A-B).  
260 Activation of Akt and focal localization of total Akt at the plasma membrane was noticeably  
261 stronger in GREB1-transduced cells when compared to GFP-transduced cells in the presence  
262 of EGF (Fig. 5A, Supplemental Fig. 2A-B). These data further suggest that GREB1 may act  
263 through PI3K to increase PIP<sub>3</sub> levels and Akt re-localization to the plasma membrane.

264 We sought to directly test if GREB1 expression influenced the conversion of PIP<sub>2</sub> to  
265 PIP<sub>3</sub>. MCF7 cells were transduced with GFP and GREB1 adenovirus and then placed in serum-  
266 free media as depicted in Figure 5A. Following serum starvation for 16 hours, lipids were  
267 extracted and PIP<sub>3</sub> levels measured by ELISA. Expression of exogenous GREB1 induced a  
268 significant increase in PIP<sub>3</sub> levels, further indicating that GREB1 augments PI3K activity.

269 Previous studies have suggested that GREB1 is primarily localized to the nucleus in  
270 patient samples and breast cancer cell lines (15, 16), thus, it remained unclear how GREB1 was  
271 able to regulate signaling through a primarily cytoplasmic pathway. Interestingly, we discovered  
272 that under serum-starved conditions, endogenous GREB1 is diffuse throughout the cytoplasm  
273 and nucleus in MCF7 cells, but upon stimulation with EGF, the vast majority of GREB1 rapidly  
274 re-localizes to the cytoplasm (Supplemental Fig. 3A). As this is contradictory to previously

275 published reports, we performed nuclear/cytoplasmic fractionation to verify cytoplasmic  
276 expression of GREB1. Under normal growth conditions (i.e. media containing FBS), GREB1 is  
277 primarily located within the cytoplasm of MCF7 cells (Supplemental Fig. 3B-C). Thus, in  
278 response to growth factor activation, GREB1 localizes to the cytoplasm wherein it can modulate  
279 the PI3K pathway.

## 280 **GREB1 regulates breast cancer proliferation through activation of the PI3K/Akt/mTOR** 281 **pathway**

282 In order to determine if GREB1-mediated Akt activation is imperative for proliferation of  
283 ER+ breast cancer cells, we tested whether constitutively activated Akt can rescue proliferation  
284 loss in GREB1 depleted cells. Thus, we made use of T47D cells which are ER+ and GREB1-  
285 expressing, but harbor a *PI3KCA*<sup>H1047L</sup> mutation rendering this pathway constitutively active and  
286 unresponsive to typical PI3K/Akt/mTOR-activating stimuli, including GREB1 exogenous  
287 expression (Fig. 2C and Supplemental Fig. 1). T47D cells were transduced with shRNA  
288 targeting a nonspecific control (shNS) or shRNA targeting GREB1 (shGREB1 #1 or shGREB1  
289 #2). Immunoblot analysis confirmed knockdown of GREB1, as well as hyperactivation of Akt in  
290 T47D cells (Fig. 6A). Proliferation of these cells was then monitored via alamar blue assay.  
291 GREB1 knockdown had no effect on the proliferation of T47D cells (Fig. 6B), suggesting  
292 constitutive Akt activation abrogates the need for GREB1 expression.

293 The proliferation of ER+ and GREB1-expressing MCF7 cells has previously been shown  
294 to be dependent on expression of GREB1 (16-18). While MCF7 cells also harbor a mutation in  
295 *PIK3CA*<sup>E545K</sup>, which is thought to be an activating mutation (34), these cells are still responsive  
296 to typical PI3K/Akt/mTOR-activating stimuli (Supplemental Fig. 1). Thus, we sought to  
297 determine if constitutively activated Akt (myristoylated-Akt) would rescue proliferation in  
298 GREB1-depleted MCF7 cells. MCF7 cells were transduced with empty vector lentivirus (EV) or

299 lentivirus expressing constitutively activated Akt (CA AKT) in combination with lentivirus  
300 expressing shRNA targeted to a non-specific control (shNS) or to GREB1 (shGREB1 #1 or  
301 shGREB1 #2). Knockdown of endogenous GREB1 resulted in decreased Akt activation in cells  
302 co-transduced with GREB1-targeted shRNA and empty vector lentivirus (Fig. 6C) as well as  
303 parental cells infected with control lentivirus (Supplemental Fig. 4). The knockdown of GREB1  
304 significantly impaired the growth of MCF7 cells co-transduced with empty vector lentivirus (Fig.  
305 6D). However, expression of constitutively active Akt (Fig. 6E), rescues the proliferation  
306 phenotype caused by GREB1 knockdown to that of control transduced cells (Fig. 6F). Together,  
307 these data demonstrate that the primary mechanism by which GREB1 drives estrogen-  
308 dependent proliferation is through modulation of Akt activity. Interestingly, stable expression of  
309 constitutively active Akt results in long-term silencing of GREB1 (Supplemental Fig. 5),  
310 suggesting a feedback loop and potentially explaining the observation that GREB1 expression is  
311 reduced in hormone-refractory disease {Mohammed, 2013 #169}.

## 312 **Discussion**

313 Despite extensive research on hormone signaling in breast cancer, the explicit  
314 mechanism by which ER drives proliferation remains largely undefined. In order to delineate this  
315 mechanism, concerted efforts have been made to identify ER-target genes involved in estrogen-  
316 induced proliferation of breast cancer cells. Several of these studies have identified GREB1 as a  
317 gene that is required for estrogen-stimulated proliferation of breast cancer cell lines (14, 16, 17).  
318 Previous studies have suggested that GREB1 regulates proliferation through modulation of ER  
319 activity (16). However, our findings show that GREB1 is not a potent regulator of ER activity and  
320 has the ability to affect the proliferation of breast cancer cell lines independent of ER expression  
321 and action (18). Here, we suggest a novel mechanism by which GREB1 regulates proliferation  
322 through fine-tuning of PI3K/Akt/mTOR signaling.

323 **GREB1 regulates proliferation of ER+ breast cancer cells through modulation of Akt**  
324 **activity**

325 Several studies have indicated complex crosstalk between ER signaling and  
326 PI3K/Akt/mTOR pathway activation and implications for this crosstalk in resistance to endocrine  
327 therapy in breast cancer patients (7-9, 35-37). However, no studies have described a  
328 comprehensive connection between activation of these signaling pathways and proliferation of  
329 breast cancer cells. The difficulty to assess this connection is compounded by the fact that the  
330 vast majority of available breast cancer cell lines contain mutations involved in the  
331 PI3K/Akt/mTOR pathway (38). Although most ER+ breast cancer cell lines contain mutations  
332 within this pathway, the specific mutations have distinctly different effects on the activation of  
333 the PI3K/Akt/mTOR pathway. Specifically, breast cancer cell lines harboring *PIK3CA*<sup>H1047R</sup>  
334 mutations (ex. T47D) have significantly higher intrinsic PI3K activity compared to breast cancer  
335 cell lines harboring *PIK3CA*<sup>E545K</sup> mutations (ex. MCF7), which have subtle effects on activation of  
336 the PI3K/Akt/mTOR pathway (11, 39). Using this to our advantage we show that in T47D cells,  
337 which harbor a constitutively active PI3K/Akt/mTOR pathway, GREB1 is no longer required for  
338 proliferation (Fig. 6A-B). However, in MCF7 cells, which harbor a *PIK3CA* mutation but still  
339 respond to pathway-activating stimuli, GREB1 is still required but knockdown of GREB1 can be  
340 rescued by constitutively active Akt (Fig. 6C-F). These data demonstrate that the requirement of  
341 GREB1 for hormone-responsive proliferation is dependent upon this novel function to alter Akt  
342 activity. Furthermore, the activation of the PI3K/Akt by GREB1 occurs through intracellular  
343 mechanisms (Fig. 4), highlighting a potentially new mode of modulating this signaling pathway  
344 without the need for RTK activation.

345 **GREB1 and endocrine resistance**

346           Despite the clear association between GREB1 and proliferation of breast cancer cells,  
347 expression of GREB1 has been correlated to better prognosis in ER+ breast cancer patients  
348 (16, 40). In a study that included only patients that received adjuvant tamoxifen monotherapy,  
349 higher GREB1 expression correlated with both prolonged disease-free survival and sensitivity to  
350 tamoxifen treatment (40). Similarly, in an *in vitro* model of tamoxifen resistance, MCF7 cells that  
351 were resistant to tamoxifen treatment had significantly less GREB1 expression compared to the  
352 parental line, suggesting GREB1 expression is lost in hormone-refractory breast cancer cells  
353 (16). These data have implicated loss of GREB1 as a causal event for therapy-resistance. Here,  
354 we show that proliferation of breast cancer cells with constitutively active PI3K/Akt/mTOR  
355 signaling no longer require GREB1 expression (Fig. 6). Constitutive activation of the  
356 PI3K/Akt/mTOR pathway is frequently associated with resistance to endocrine therapies and is  
357 the basis for numerous clinical trials investigating PI3K/Akt/mTOR pathway inhibitors in  
358 endocrine-resistant patient populations (7-10). In patients with hormone-refractory disease with  
359 hyperactivation of the PI3K/Akt/mTOR pathway, the pressure to express GREB1 is lost. Thus,  
360 decreased GREB1 expression in advanced disease may be the result of constitutive  
361 PI3K/Akt/mTOR activity rather than a cause of therapeutic bypass. In support of this notion,  
362 stable expression of constitutively active Akt resulted in silencing of GREB1 expression after  
363 several passages (Supplemental Fig. 5). These findings warrant further research into the use of  
364 GREB1 as a clinical biomarker for treatment selection.

#### 365 **Declaration of interest**

366 The authors have no conflicts of interest to disclose.

#### 367 **Funding**

368 This research was funded in part by Pelotonia (CNH).

#### 369 **Acknowledgements**



370 We thank Paul Herman, Clarissa Wormsbaecher, Weiwei Liu, and Makanko Komara for critical  
371 reading of this manuscript prior to submission.

## 372 References

- 373 1. Siegel RL, Miller KD, Jemal A. Cancer statistics, 2018. *CA: a cancer journal for clinicians*. 2018  
374 Jan;68(1):7-30. PubMed PMID: 29313949. Epub 2018/01/10. eng.
- 375 2. Clarke R, Tyson JJ, Dixon JM. Endocrine resistance in breast cancer--An overview and update.  
376 *Mol Cell Endocrinol*. 2015 Dec 15;418 Pt 3:220-34. PubMed PMID: 26455641. Pubmed Central PMCID:  
377 PMC4684757.
- 378 3. Dixon JM. Endocrine Resistance in Breast Cancer. *New Journal of Science*. 2014;2014:1-27.
- 379 4. Libson S, Lippman M. A review of clinical aspects of breast cancer. *International review of*  
380 *psychiatry (Abingdon, England)*. 2014 Feb;26(1):4-15. PubMed PMID: 24716497. Epub 2014/04/11. eng.
- 381 5. Patani N, Martin LA. Understanding response and resistance to oestrogen deprivation in ER-  
382 positive breast cancer. *Mol Cell Endocrinol*. 2014 Jan 25;382(1):683-94. PubMed PMID: 24121024. Epub  
383 2013/10/15. eng.
- 384 6. Ali S, Coombes RC. Endocrine-responsive breast cancer and strategies for combating resistance.  
385 *Nat Rev Cancer*. 2002 Feb;2(2):101-12. PubMed PMID: 12635173.
- 386 7. Campbell RA, Bhat-Nakshatri P, Patel NM, Constantinidou D, Ali S, Nakshatri H.  
387 Phosphatidylinositol 3-kinase/AKT-mediated activation of estrogen receptor alpha: a new model for  
388 anti-estrogen resistance. *J Biol Chem*. 2001 Mar 30;276(13):9817-24. PubMed PMID: 11139588. Epub  
389 2001/01/15. eng.
- 390 8. Miller TW, Balko JM, Arteaga CL. Phosphatidylinositol 3-kinase and antiestrogen resistance in  
391 breast cancer. *Journal of clinical oncology : official journal of the American Society of Clinical Oncology*.  
392 2011 Nov 20;29(33):4452-61. PubMed PMID: 22010023. Pubmed Central PMCID: PMC3221526. Epub  
393 2011/10/20. eng.
- 394 9. Miller TW, Hennessy BT, Gonzalez-Angulo AM, Fox EM, Mills GB, Chen H, et al. Hyperactivation  
395 of phosphatidylinositol-3 kinase promotes escape from hormone dependence in estrogen receptor-  
396 positive human breast cancer. *The Journal of clinical investigation*. 2010 Jul;120(7):2406-13. PubMed  
397 PMID: 20530877. Pubmed Central PMCID: PMC2898598. Epub 2010/06/10. eng.
- 398 10. Miller WR, Larionov A, Renshaw L, Anderson TJ, Walker JR, Krause A, et al. Gene expression  
399 profiles differentiating between breast cancers clinically responsive or resistant to letrozole. *Journal of*  
400 *clinical oncology : official journal of the American Society of Clinical Oncology*. 2009 Mar 20;27(9):1382-  
401 7. PubMed PMID: 19224856. Epub 2009/02/20. eng.
- 402 11. Ellis MJ, Perou CM. The genomic landscape of breast cancer as a therapeutic roadmap. *Cancer*  
403 *discovery*. 2013 Jan;3(1):27-34. PubMed PMID: 23319768. Pubmed Central PMCID: PMC3553590. Epub  
404 2013/01/16. eng.
- 405 12. Simoncini T, Hafezi-Moghadam A, Brazil DP, Ley K, Chin WW, Liao JK. Interaction of oestrogen  
406 receptor with the regulatory subunit of phosphatidylinositol-3-OH kinase. *Nature*. 2000 Sep  
407 28;407(6803):538-41. PubMed PMID: 11029009. Pubmed Central PMCID: PMC2670482. Epub  
408 2000/10/12. eng.
- 409 13. Creighton CJ, Fu X, Hennessy BT, Casa AJ, Zhang Y, Gonzalez-Angulo AM, et al. Proteomic and  
410 transcriptomic profiling reveals a link between the PI3K pathway and lower estrogen-receptor (ER) levels  
411 and activity in ER+ breast cancer. *Breast cancer research : BCR*. 2010;12(3):R40. PubMed PMID:  
412 20569503. Pubmed Central PMCID: PMC2917035. Epub 2010/06/24. eng.

- 413 14. Ghosh MG, Thompson DA, Weigel RJ. PDZK1 and GREB1 are estrogen-regulated genes expressed  
414 in hormone-responsive breast cancer. *Cancer Res.* 2000 Nov 15;60(22):6367-75. PubMed PMID:  
415 11103799. Epub 2000/12/05. eng.
- 416 15. Hnatyszyn HJ, Liu M, Hilger A, Herbert L, Gomez-Fernandez CR, Jorda M, et al. Correlation of  
417 GREB1 mRNA with protein expression in breast cancer: validation of a novel GREB1 monoclonal  
418 antibody. *Breast Cancer Res Treat.* 2010 Jul;122(2):371-80. PubMed PMID: 19842031.
- 419 16. Mohammed H, D'Santos C, Serandour AA, Ali HR, Brown GD, Atkins A, et al. Endogenous  
420 purification reveals GREB1 as a key estrogen receptor regulatory factor. *Cell Rep.* 2013 Feb 21;3(2):342-  
421 9. PubMed PMID: 23403292.
- 422 17. Rae JM, Johnson MD, Scheys JO, Cordero KE, Larios JM, Lippman ME. GREB 1 is a critical  
423 regulator of hormone dependent breast cancer growth. *Breast Cancer Res Treat.* 2005 Jul;92(2):141-9.  
424 PubMed PMID: 15986123.
- 425 18. Haines CN, Braunreiter KM, Mo XM, Burd CJ. GREB1 isoforms regulate proliferation independent  
426 of ERalpha co-regulator activities in breast cancer. *Endocrine-related cancer.* 2018 Jul;25(7):735-46.  
427 PubMed PMID: 29695586. Epub 2018/04/27. eng.
- 428 19. Burd CJ, Petre CE, Moghadam H, Wilson EM, Knudsen KE. Cyclin D1 binding to the androgen  
429 receptor (AR) NH2-terminal domain inhibits activation function 2 association and reveals dual roles for  
430 AR corepression. *Mol Endocrinol.* 2005 Mar;19(3):607-20. PubMed PMID: 15539430. Epub 2004/11/13.  
431 eng.
- 432 20. Lee MS, Jeong MH, Lee HW, Han HJ, Ko A, Hewitt SM, et al. PI3K/AKT activation induces PTEN  
433 ubiquitination and destabilization accelerating tumorigenesis. *Nature communications.* 2015 Jul  
434 17;6:7769. PubMed PMID: 26183061. Pubmed Central PMCID: PMC4518267. Epub 2015/07/18. eng.
- 435 21. Boehm JS, Zhao JJ, Yao J, Kim SY, Firestein R, Dunn IF, et al. Integrative genomic approaches  
436 identify IKBKE as a breast cancer oncogene. *Cell.* 2007 Jun 15;129(6):1065-79. PubMed PMID: 17574021.  
437 Epub 2007/06/19. eng.
- 438 22. Patterson AR, Mo X, Shapiro A, Wernke KE, Archer TK, Burd CJ. Sustained reprogramming of the  
439 estrogen response after chronic exposure to endocrine disruptors. *Mol Endocrinol.* 2015 Mar;29(3):384-  
440 95. PubMed PMID: 25594248. Pubmed Central PMCID: PMC4347288. Epub 2015/01/17. eng.
- 441 23. Guan X, LaPak KM, Hennessey RC, Yu CY, Shakya R, Zhang J, et al. Stromal Senescence By  
442 Prolonged CDK4/6 Inhibition Potentiates Tumor Growth. *Molecular cancer research : MCR.* 2017  
443 Mar;15(3):237-49. PubMed PMID: 28039358. Pubmed Central PMCID: 5334447.
- 444 24. Debacq-Chainiaux F, Erusalimsky JD, Campisi J, Toussaint O. Protocols to detect senescence-  
445 associated beta-galactosidase (SA-beta-gal) activity, a biomarker of senescent cells in culture and in vivo.  
446 *Nat Protoc.* 2009;4(12):1798-806. PubMed PMID: 20010931. Epub 2009/12/17. eng.
- 447 25. Xu Y, Li N, Xiang R, Sun P. Emerging roles of the p38 MAPK and PI3K/AKT/mTOR pathways in  
448 oncogene-induced senescence. *Trends Biochem Sci.* 2014 Jun;39(6):268-76. PubMed PMID: 24818748.  
449 Pubmed Central PMCID: PMC4358807.
- 450 26. Freund A, Patil CK, Campisi J. p38MAPK is a novel DNA damage response-independent regulator  
451 of the senescence-associated secretory phenotype. *EMBO J.* 2011 Apr 20;30(8):1536-48. PubMed PMID:  
452 21399611. Pubmed Central PMCID: PMC3102277.
- 453 27. Courtois-Cox S, Jones SL, Cichowski K. Many roads lead to oncogene-induced senescence.  
454 *Oncogene.* 2008 May 01;27(20):2801-9. PubMed PMID: 18193093.
- 455 28. She QB, Chandarlapaty S, Ye Q, Lobo J, Haskell KM, Leander KR, et al. Breast tumor cells with  
456 PI3K mutation or HER2 amplification are selectively addicted to Akt signaling. *PLoS One.* 2008 Aug  
457 26;3(8):e3065. PubMed PMID: 18725974. Pubmed Central PMCID: PMC2516933. Epub 2008/08/30. eng.
- 458 29. Manning BD, Toker A. AKT/PKB Signaling: Navigating the Network. *Cell.* 2017 Apr 20;169(3):381-  
459 405. PubMed PMID: 28431241. Pubmed Central PMCID: PMC5546324. Epub 2017/04/22. eng.

- 460 30. Du K, Tsihchlis PN. Regulation of the Akt kinase by interacting proteins. *Oncogene*. 2005 Nov  
461 14;24(50):7401-9. PubMed PMID: 16288287. Epub 2005/11/17. eng.
- 462 31. Bellacosa A, Chan TO, Ahmed NN, Datta K, Malstrom S, Stokoe D, et al. Akt activation by growth  
463 factors is a multiple-step process: the role of the PH domain. *Oncogene*. 1998 Jul 23;17(3):313-25.  
464 PubMed PMID: 9690513. Epub 1998/08/05. eng.
- 465 32. Bellacosa A, Kumar CC, Di Cristofano A, Testa JR. Activation of AKT kinases in cancer:  
466 implications for therapeutic targeting. *Advances in cancer research*. 2005;94:29-86. PubMed PMID:  
467 16095999. Epub 2005/08/13. eng.
- 468 33. Liu P, Cheng H, Roberts TM, Zhao JJ. Targeting the phosphoinositide 3-kinase pathway in cancer.  
469 *Nature reviews Drug discovery*. 2009;8(8):627-44. PubMed PMID: 19644473.
- 470 34. Bosch A, Li Z, Bergamaschi A, Ellis H, Toska E, Prat A, et al. PI3K inhibition results in enhanced  
471 estrogen receptor function and dependence in hormone receptor-positive breast cancer. *Science*  
472 *translational medicine*. 2015 Apr 15;7(283):283ra51. PubMed PMID: 25877889. Pubmed Central PMCID:  
473 PMC4433148. Epub 2015/04/17. eng.
- 474 35. Bhat-Nakshatri P, Wang G, Appaiah H, Luktuke N, Carroll JS, Geistlinger TR, et al. AKT alters  
475 genome-wide estrogen receptor alpha binding and impacts estrogen signaling in breast cancer. *Mol Cell*  
476 *Biol*. 2008 Dec;28(24):7487-503. PubMed PMID: 18838536. Pubmed Central PMCID: PMC2593438. Epub  
477 2008/10/08. eng.
- 478 36. Chen D, Washbrook E, Sarwar N, Bates GJ, Pace PE, Thirunuvakkarasu V, et al. Phosphorylation  
479 of human estrogen receptor alpha at serine 118 by two distinct signal transduction pathways revealed  
480 by phosphorylation-specific antisera. *Oncogene*. 2002 Jul 25;21(32):4921-31. PubMed PMID: 12118371.  
481 Epub 2002/07/16. eng.
- 482 37. Kato S, Endoh H, Masuhiro Y, Kitamoto T, Uchiyama S, Sasaki H, et al. Activation of the estrogen  
483 receptor through phosphorylation by mitogen-activated protein kinase. *Science (New York, NY)*. 1995  
484 Dec 1;270(5241):1491-4. PubMed PMID: 7491495. Epub 1995/12/01. eng.
- 485 38. Smith SE, Mellor P, Ward AK, Kendall S, McDonald M, Vizeacoumar FS, et al. Molecular  
486 characterization of breast cancer cell lines through multiple omic approaches. *Breast cancer research :*  
487 *BCR*. 2017 Jun 5;19(1):65. PubMed PMID: 28583138. Pubmed Central PMCID: PMC5460504. Epub  
488 2017/06/07. eng.
- 489 39. Jamieson S, Flanagan JU, Kolekar S, Buchanan C, Kendall JD, Lee WJ, et al. A drug targeting only  
490 p110alpha can block phosphoinositide 3-kinase signalling and tumour growth in certain cell types.  
491 *Biochem J*. 2011 Aug 15;438(1):53-62. PubMed PMID: 21668414. Pubmed Central PMCID: PMC3174055.  
492 Epub 2011/06/15. eng.
- 493 40. Wu Y, Zhang Z, Cenciarini ME, Proietti CJ, Amasino M, Hong T, et al. Tamoxifen Resistance in  
494 Breast Cancer Is Regulated by the EZH2-ERalpha-GREB1 Transcriptional Axis. *Cancer Res*. 2018 Feb  
495 1;78(3):671-84. PubMed PMID: 29212856. Pubmed Central PMCID: PMC5967248. Epub 2017/12/08.  
496 eng.

497

498

499

500

501 **Figure 1- Exogenous GREB1 initiates cellular senescence.** MCF7 or ZR-75-1 cells were transduced  
502 with adenovirus expressing GFP or GREB1. **A)** Immunoblot depicting the relative overexpression of  
503 GREB1 in cells transduced with GREB1 adenovirus compared to GFP control. **B)** Proliferation of  
504 transduced cells was measured by alamar blue assay. Data are plotted as mean fluorescence normalized to  
505 Day 0  $\pm$  SD; n=3 for each cell line. \* $p \leq 0.05$ , \*\*  $p \leq 0.005$ . **C)** Cells were fixed and stained for SA- $\beta$ -  
506 galactosidase activity 7 days post-transduction.

507 **Figure 2- GREB1 modulates PI3K/Akt pathway signaling.** **A)** MCF7 cells were transduced with  
508 adenovirus expressing GFP or GREB1. Cell lysates were harvested 2 days post-transduction and analyzed  
509 by immunoblot for indicated proteins in the p38 MAPK pathway. **B)** MCF7 cells were transduced with  
510 adenovirus expressing GFP or GREB1. Cell lysates were harvested 2 days post-transduction and analyzed  
511 by immunoblot for indicated proteins in the PI3K/Akt pathway. **C)** HCC1500, ZR-75-1, MCF7, and  
512 T47D cells were transduced with adenovirus expressing GFP or GREB1. Cell lysates were harvested 2  
513 days post-transduction and analyzed by immunoblot for indicated proteins.

514 **Figure 3- GREB1-induced hyperactivation of Akt is PI3K-dependent.** **A)** MCF7 cells were  
515 transduced with adenovirus expressing GFP or GREB1 and treated with DMSO or 40 nM GDC0941  
516 simultaneously. Cell lysates were harvested 24 hours post-transduction and immunoblot analysis was  
517 performed with the indicated antibodies. **B)** MCF7 cells were transduced with lentivirus targeted to a  
518 nonspecific control (shNS), PIK3CA, PTEN, or PDK1. Following selection, cells were transduced with  
519 GFP or GREB1 adenovirus. Cell lysates were harvested 24 hours post adenovirus transduction. Following  
520 SDS-PAGE, immunoblot analysis was performed with indicated antibodies.

521 **Figure 4- GREB1 activates Akt through intracellular mechanisms.** **A)** Conditioned media from  
522 MCF7 cells transduced with GFP or GREB1 adenovirus was added to un-transduced cells. Cell lysates  
523 from transduced cells (GFP or GREB1) and un-transduced cells cultured in conditioned media (GFP CM  
524 or GREB1 CM) were harvested 24 hours later. Lysates were analyzed by immunoblot for indicated

525 proteins. **B)** MCF7 cells were transduced with adenovirus expressing GFP or GREB1. Transduced cells  
526 were then cultured with un-transduced cells at a 1:1 ratio for 24 hours. Cells were harvested and sorted for  
527 GFP. Cell lysates were analyzed via immunoblot for expression of the indicated proteins.

528 **Figure 5- Exogenous GREB1 promotes recruitment of Akt to the plasma membrane.** **A)** MCF7 cells  
529 were transduced with adenovirus expressing GFP or GREB1. The cells were then cultured in serum-free  
530 media for 16 hours before being stimulated with 1 ng/mL EGF for 0 or 5 minutes. Cells were fixed and  
531 stained for DAPI or p-Akt (Ser473). Immunofluorescence microscopy was used to visualize the activation  
532 and localization of Akt. **B)** MCF7 cells were transduced with adenovirus to express exogenous GFP or  
533 GREB1 and serum starved for 16 hours. Lipids were extracted from all samples and levels of PIP<sub>3</sub> were  
534 measured via ELISA. Graphs represent mean PIP<sub>3</sub> (pmol) + SD (n=3).

535 **Figure 6- GREB1 regulates breast cancer proliferation through activation of the PI3K/Akt pathway**  
536 **A)** T47D cells were transduced with lentivirus expressing non-specific shRNA or shRNA targeted to  
537 GREB1 (shGREB1 #1 or shGREB1 #2). Immunoblot depicting the expression of indicated proteins. **B)**  
538 Proliferation was measured via alamar blue assay. Data are plotted as mean fluorescence normalized to  
539 Day 0 ± SD; n=3. **C)** MCF7 cells were transduced with lentivirus expressing empty vector (EV) and  
540 either non-specific shRNA or shRNA targeted to GREB1 (shGREB1 #1 or shGREB1 #2). Immunoblot  
541 showing the expression of labeled proteins. **D)** Proliferation was measured via alamar blue assay. Data are  
542 plotted as mean fluorescence normalized to Day 0 ± SD; n=3. **E)** MCF7 cells were transduced with  
543 lentivirus expressing myristoylated Akt (CA AKT) and either non-specific shRNA or shRNA targeted to  
544 GREB1 (shGREB1 #1 or shGREB1 #2). Immunoblot demonstrating the expression of indicated protein.  
545 **F)** Proliferation was measured via alamar blue assay. Data are plotted as mean fluorescence normalized to  
546 Day 0 ± SD; n=3.

547 **Supplemental Figure S1 Different mutations in the PI3K pathway have varying levels of Akt**  
548 **activity in breast cancer cell lines.** MCF7, ZR-75-1, and T47D cells were serum starved for 16 hours

549 before stimulation with 1 ng/mL of EGF for 1 hour. Cell lysates were harvested and analyzed by  
550 immunoblot for the indicated proteins.

551 **Supplemental Figure S2 GREB1 overexpression induces Akt hyperactivation at the plasma**  
552 **membrane.** MCF7 cells were transduced with adenovirus expressing GFP or GREB1. The cells were  
553 then cultured in serum-free media for 16 hours before being stimulated with 1 ng/mL EGF for 0 or 5  
554 minutes. Cells were fixed and stained for DAPI and **A) Akt** or **B) p-Akt (Thr308)**. Immunofluorescence  
555 microscopy was used to visualize the activation and localization of Akt.

556 **Supplemental Figure S3 Endogenous GREB1 re-localizes to the cytoplasm under growth-**  
557 **stimulatory conditions.** **A)** MCF7 cells were serum starved for 4 hours and stimulated with 1 ng/mL  
558 EGF for 0, 5, or 15 minutes. Cells were fixed and stained for DAPI and endogenous GREB1.  
559 Immunofluorescence microscopy was used to visualize GREB1 localization. **B)** Cytoplasmic and nuclear  
560 fractions were extracted from MCF7 whole cell lysate using high-speed centrifugation. Fractionated cell  
561 lysates were subjected to SDS-PAGE and analyzed via immunoblot for indicated proteins. **C)** MCF7 cells  
562 cultured in full serum media were fixed and stained for DAPI and endogenous GREB1.  
563 Immunofluorescence microscopy was used to visualize GREB1 localization under normal growth  
564 conditions.

565 **Supplemental Figure S4 Endogenous GREB1 regulates Akt activation** MCF7 cells transduced with  
566 lentivirus expressing non-specific shRNA (shNS) or one of two shRNAs targeted to GREB1 (shGREB1  
567 #1 or shGREB1 #2) were placed in serum/phenol red free media for 16 hours followed by 1 hour of  
568 activation with 1ng/ml EGF. Cells were harvested and lysates analyzed via immunoblot for Akt activation  
569 pathway.

570 **Supplemental Figure S5 Constitutive Akt activation causes long-term silencing of GREB1**  
571 **expression.** Following transduction with control (EV) or constitutively active Akt (CA) expressing  
572 lentivirus, MCF7 stable lines were generated by placing cells on selection. Lysates from different

573 passages were probed for GREB1 expression and Akt. activation Two distinct stable lines are depicted

574 (top panel and bottom panel, respectively).

575

576

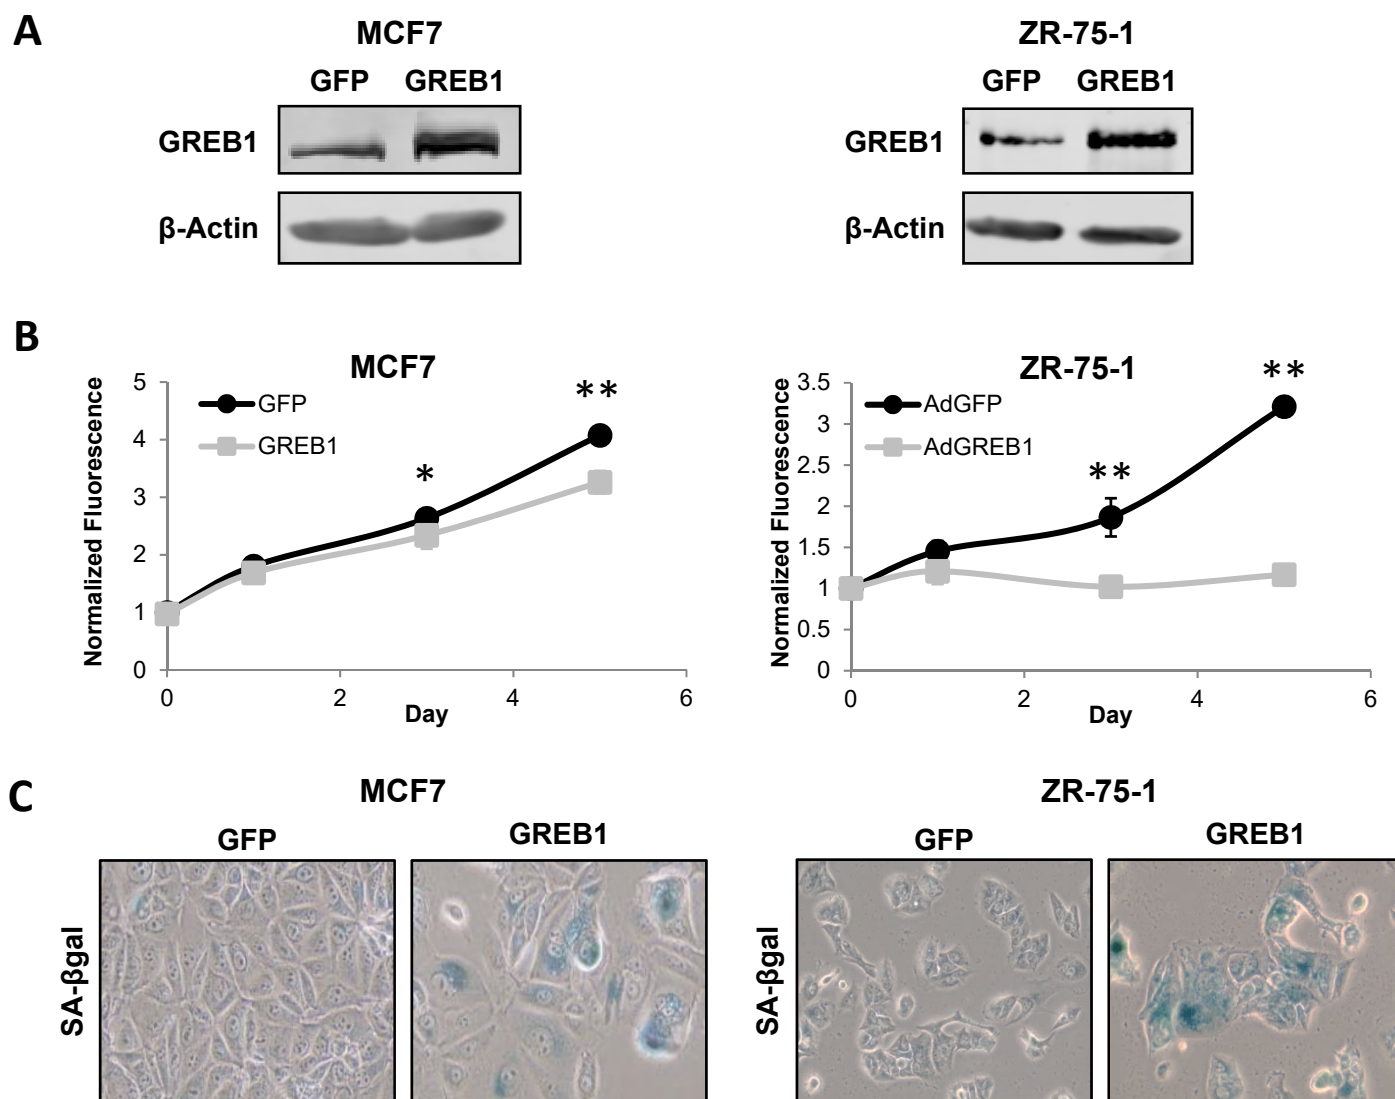

Figure 1



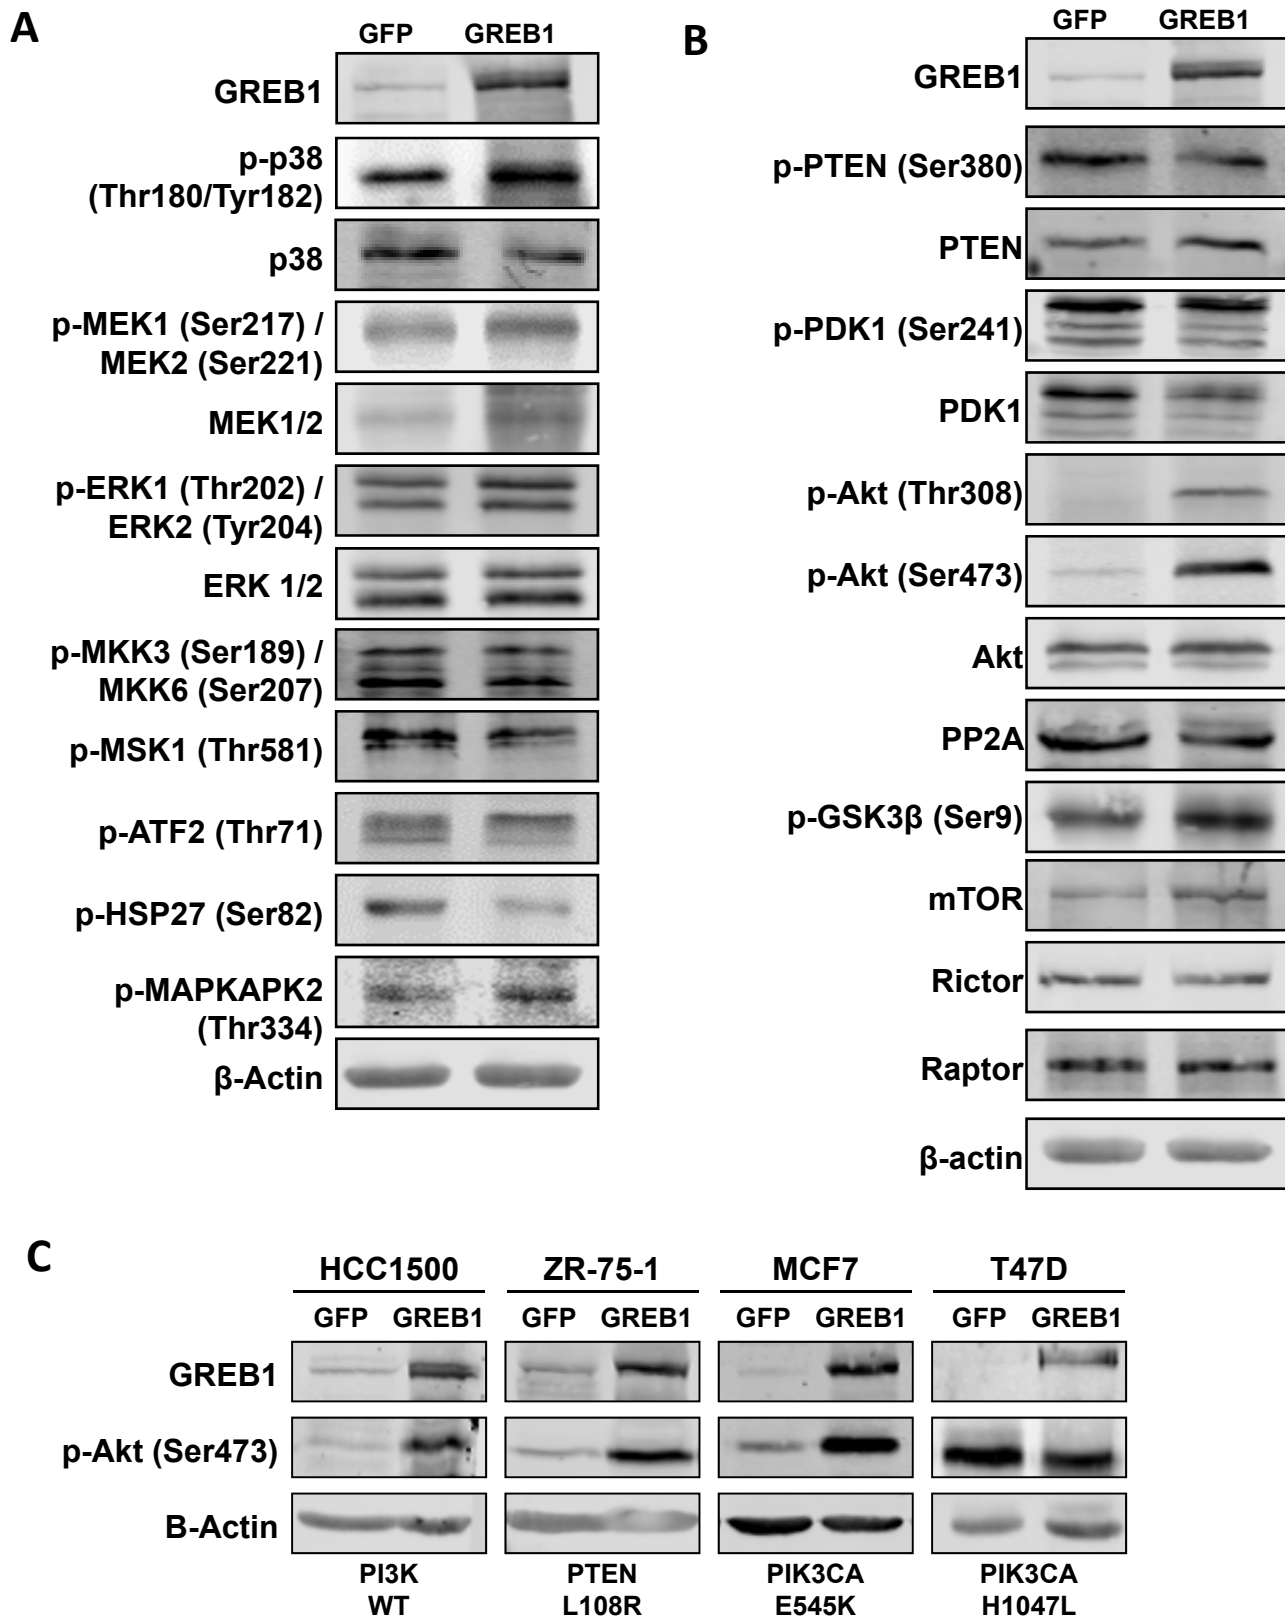

Figure 2

**A**

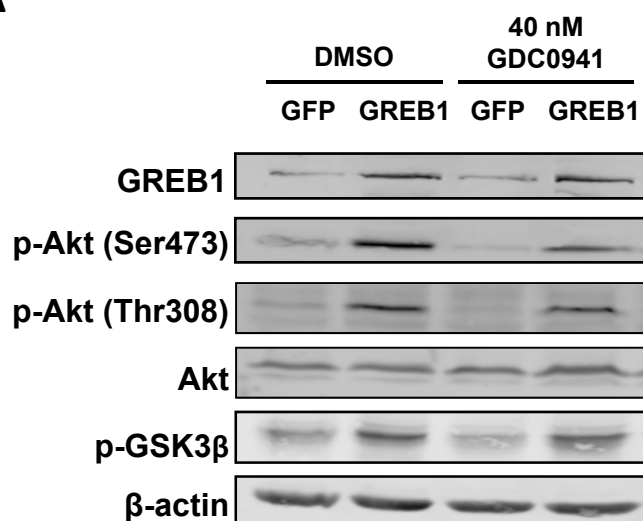

**B**

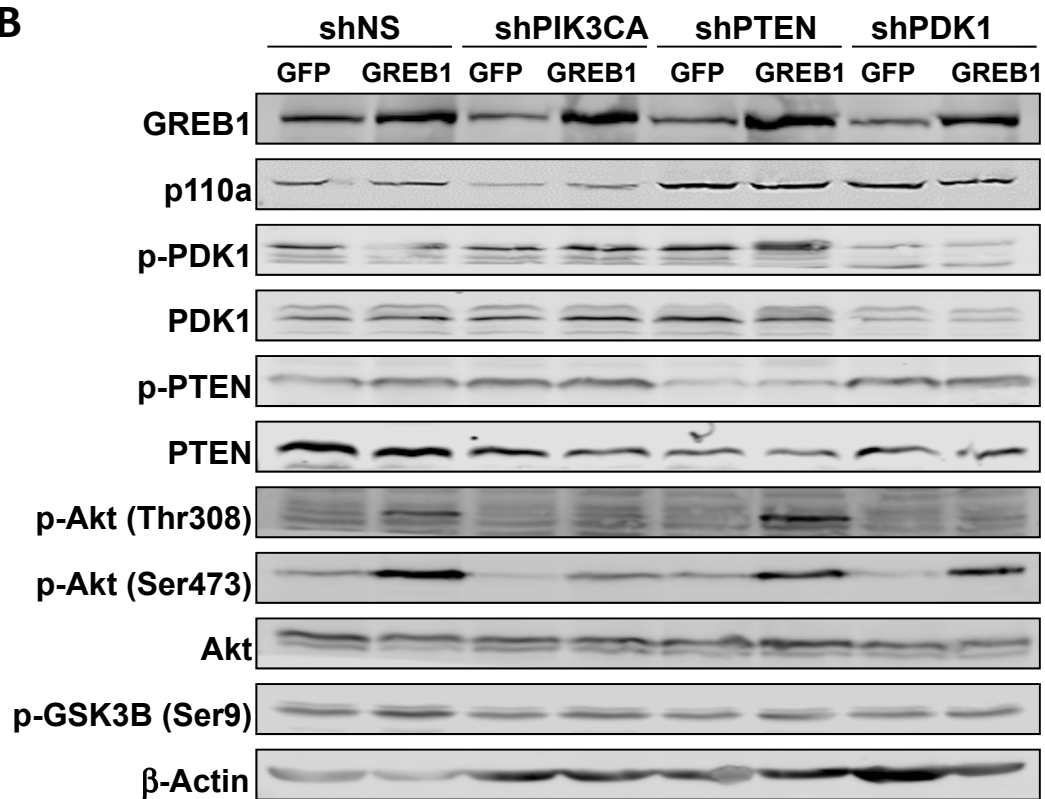

Figure 3

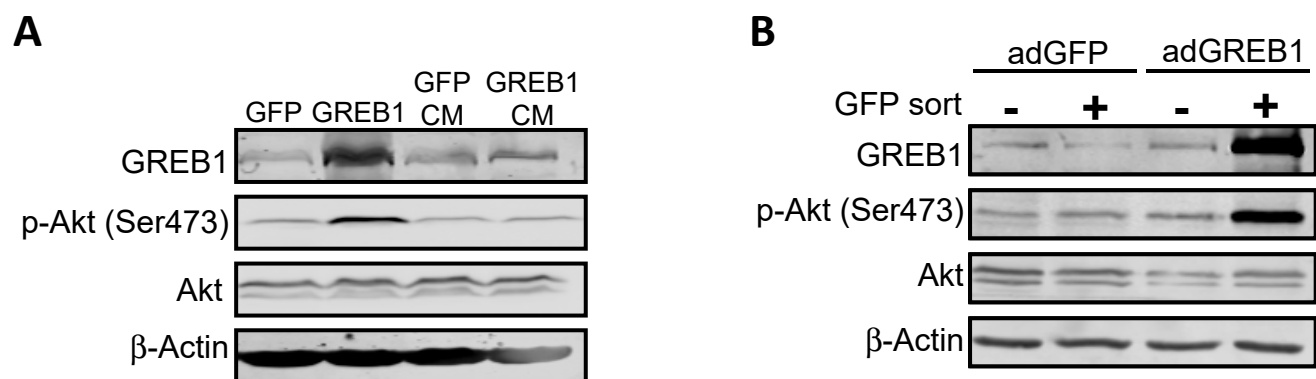

Figure 4

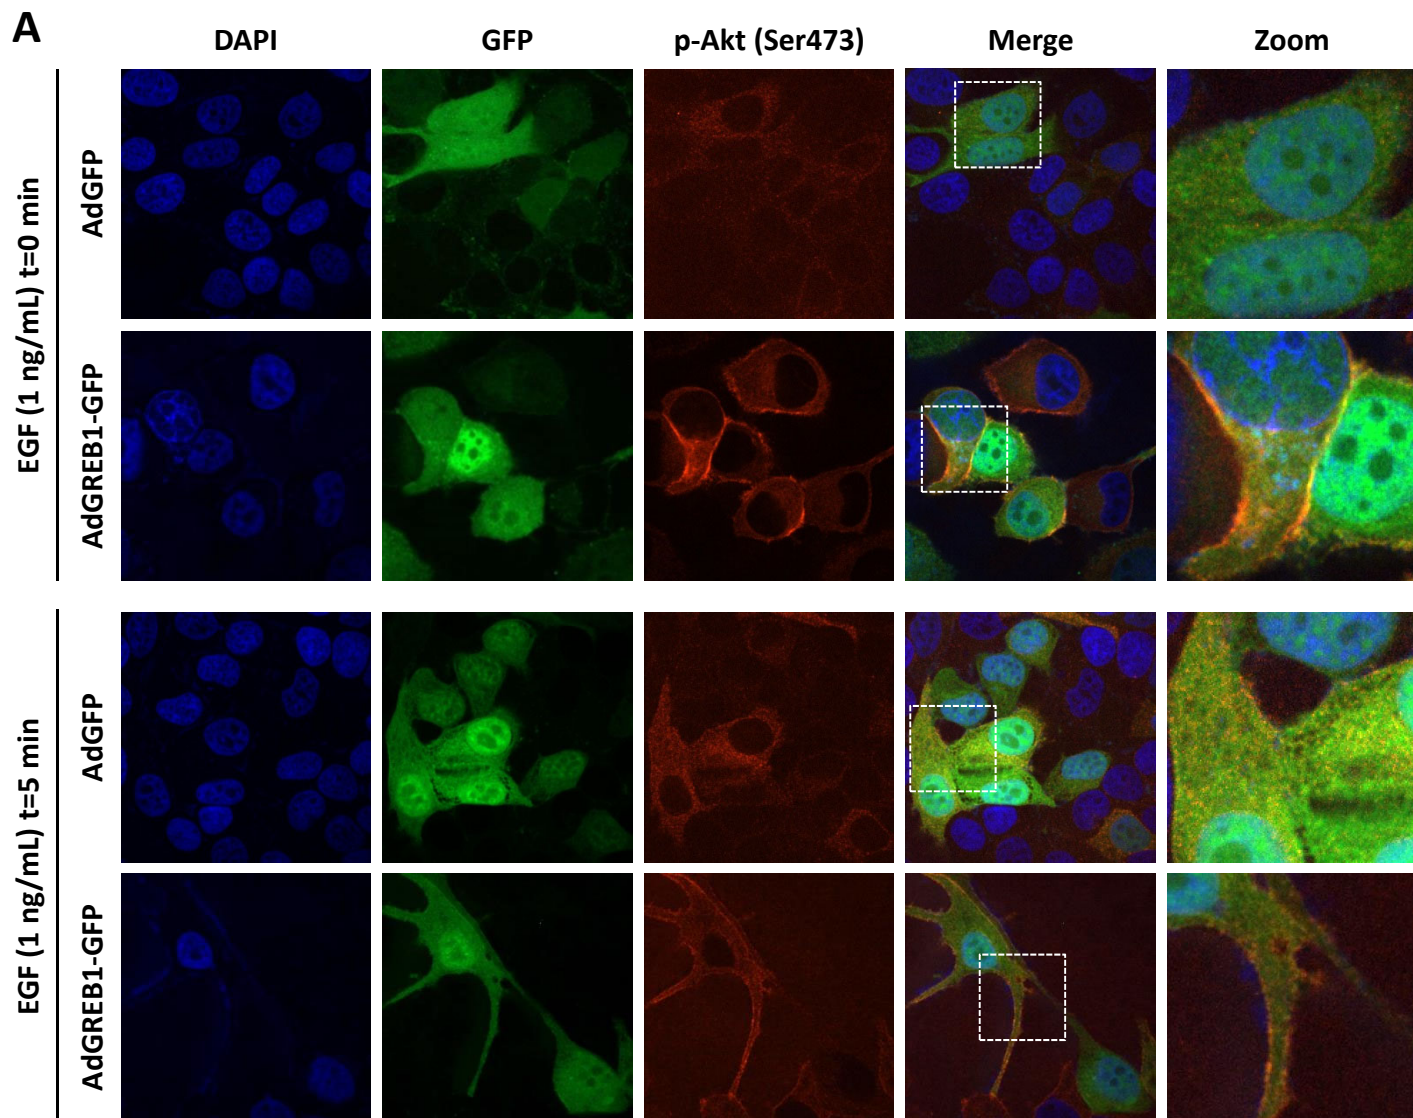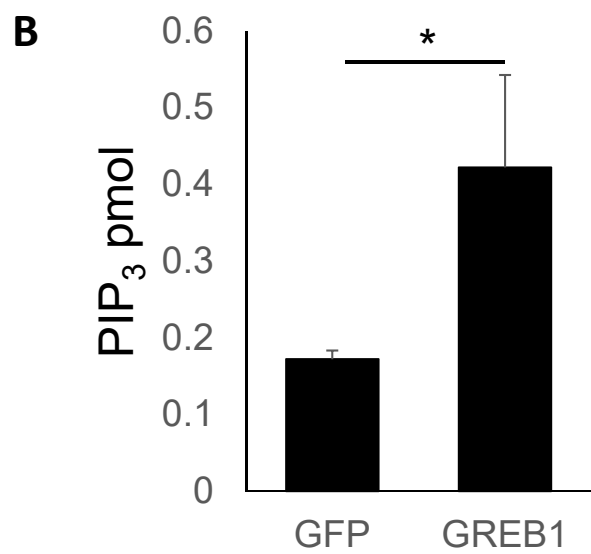

Figure 5

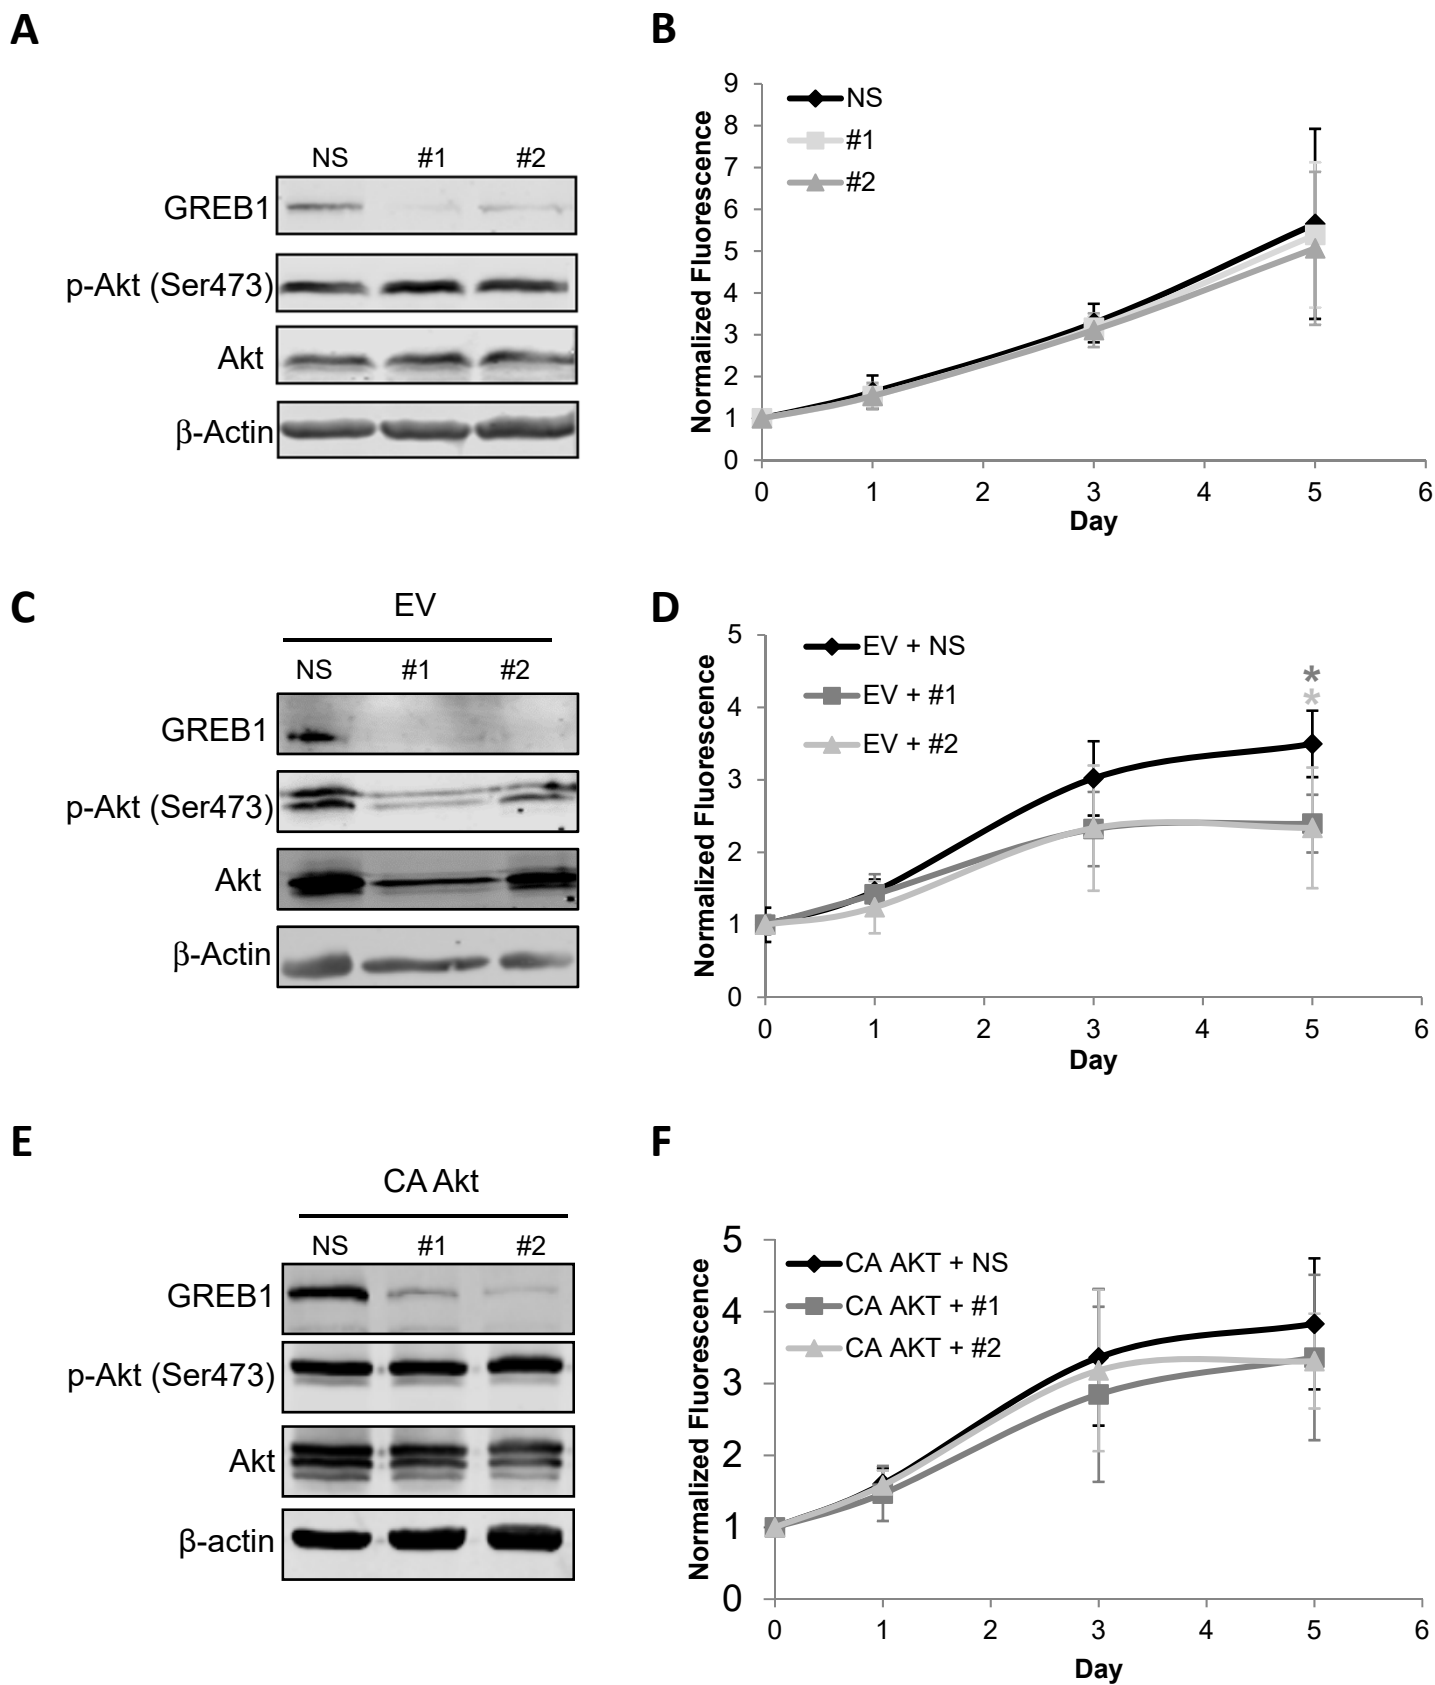

Figure 6

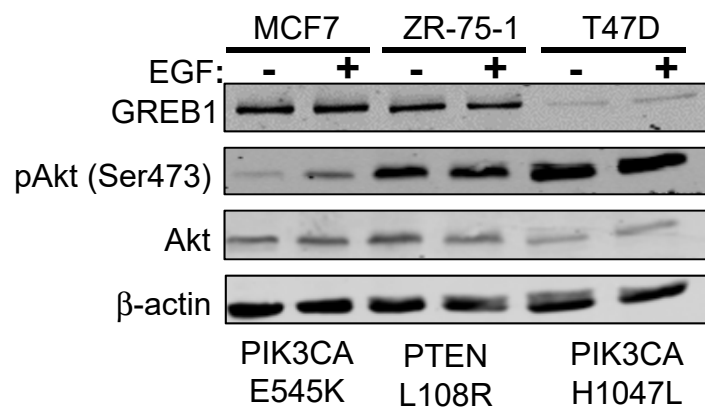

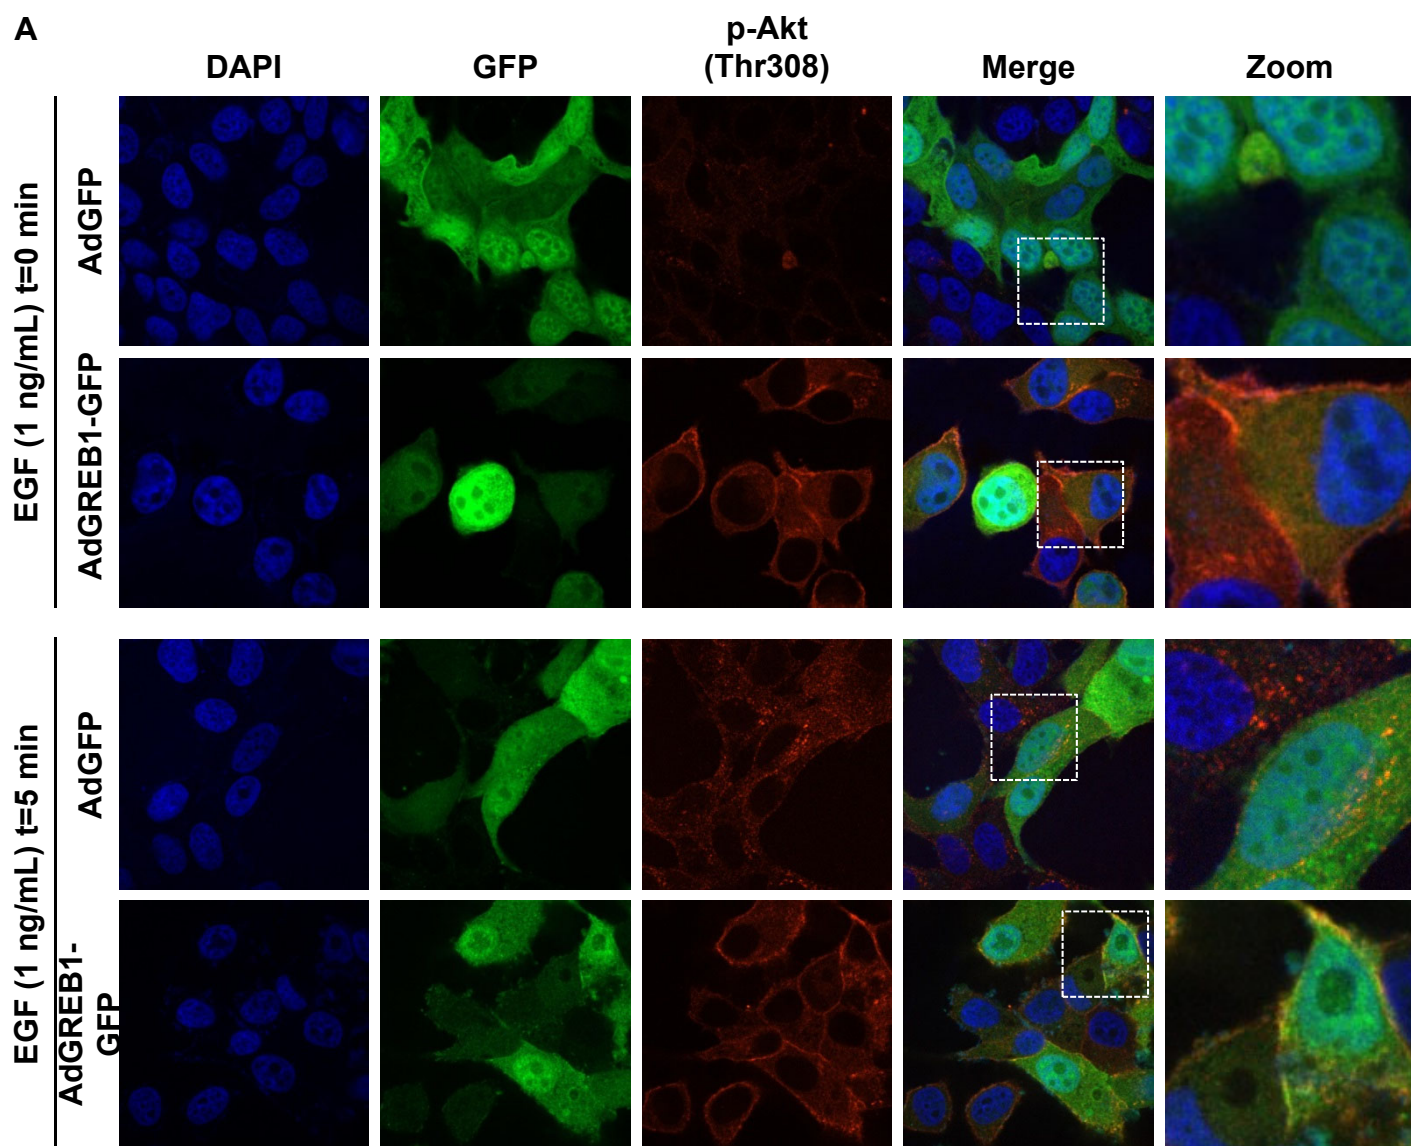

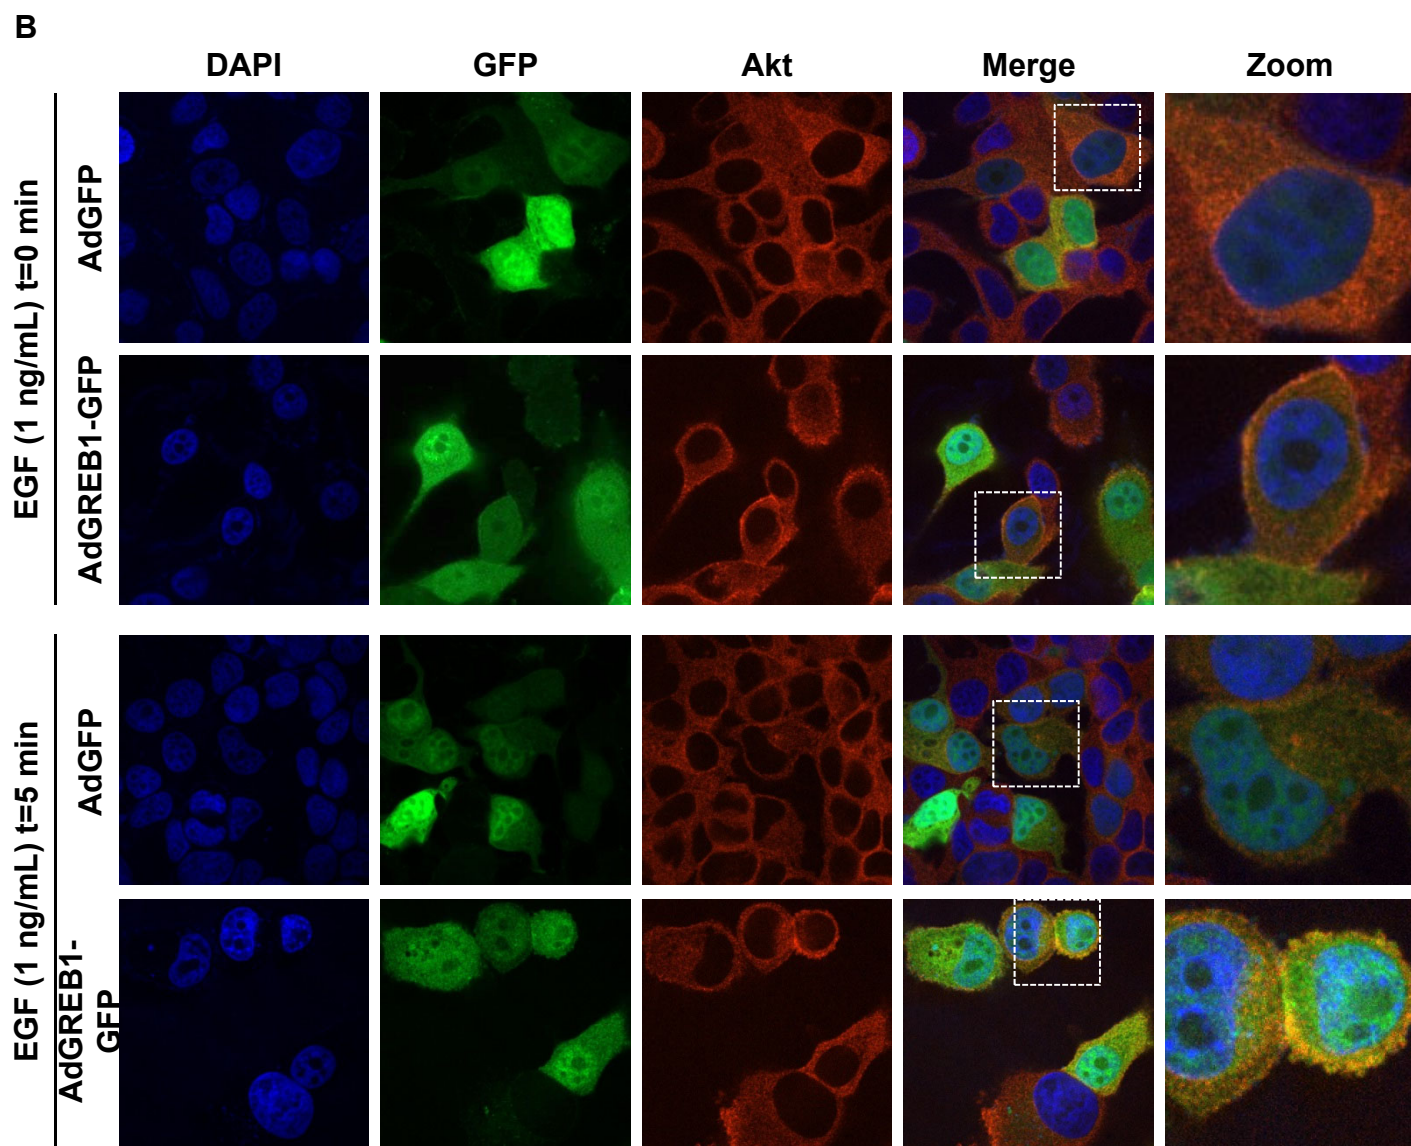



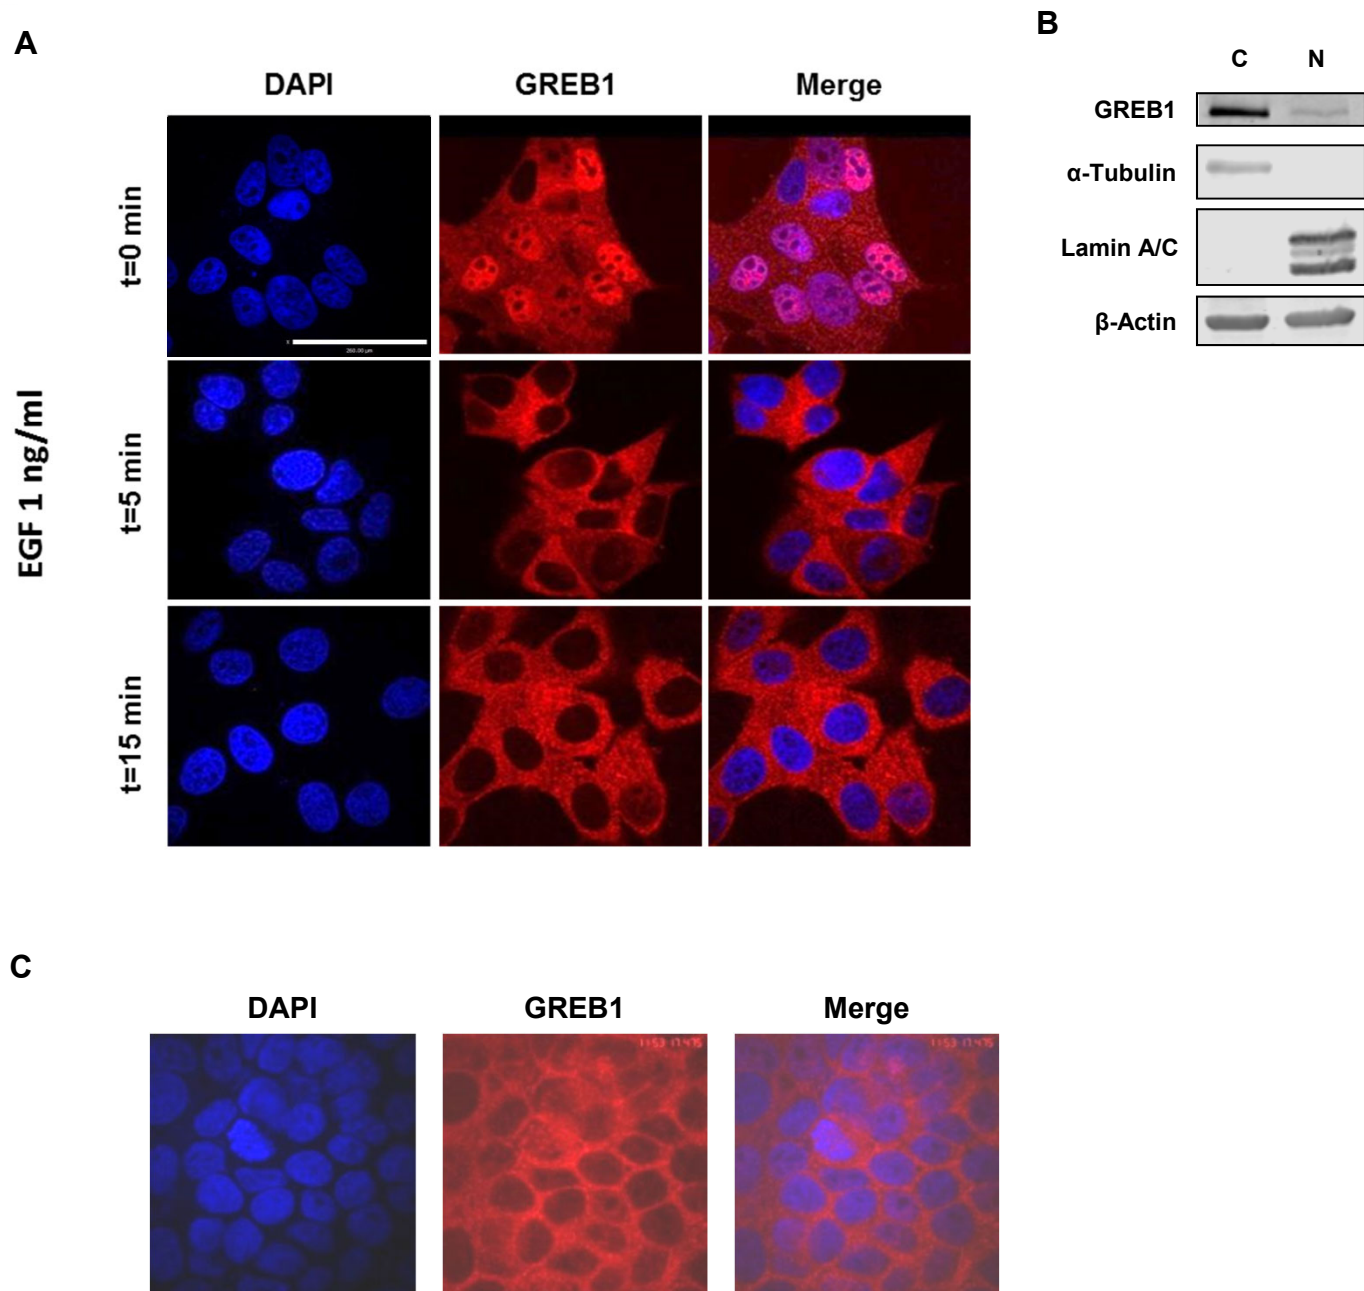

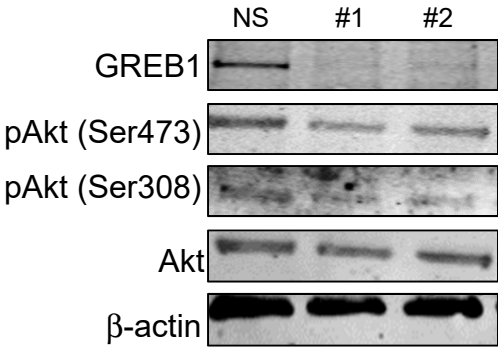

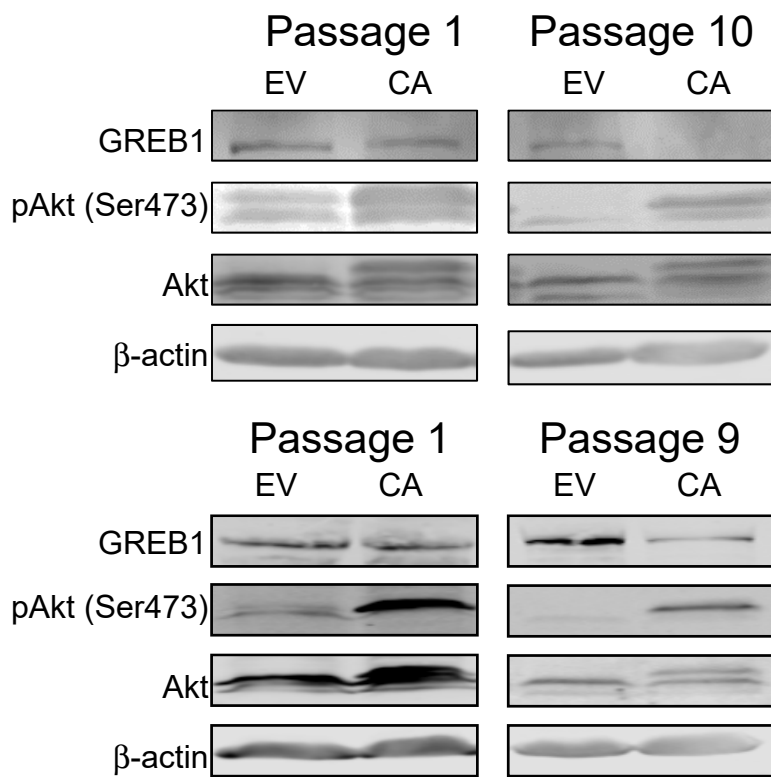

Source: https://www.biorxiv.org/content/10.1101/704825v1.full.pdf
